# Supplementary material for: Sunlight-Catalysed Green Synthesis of Copper Nanoparticles Using Green Tea Extract: Correlating Solar Irradiance with Nanoparticle Physicochemical and Antimicrobial Properties
Source: Research Square preprint supplement (doi:10.21203/rs.3.rs-7643221/v1), 2025-10-07
Supplement: Supplementary file 1 [file e7e2e8430e6591a9eef3a274.docx]

Supplementary Information

**Sunlight-Catalysed Green Synthesis of Copper Nanoparticles Using Green Tea Extract**

# UV–Vis Spectroscopy Raw Data (Absorbance vs Wavelength)


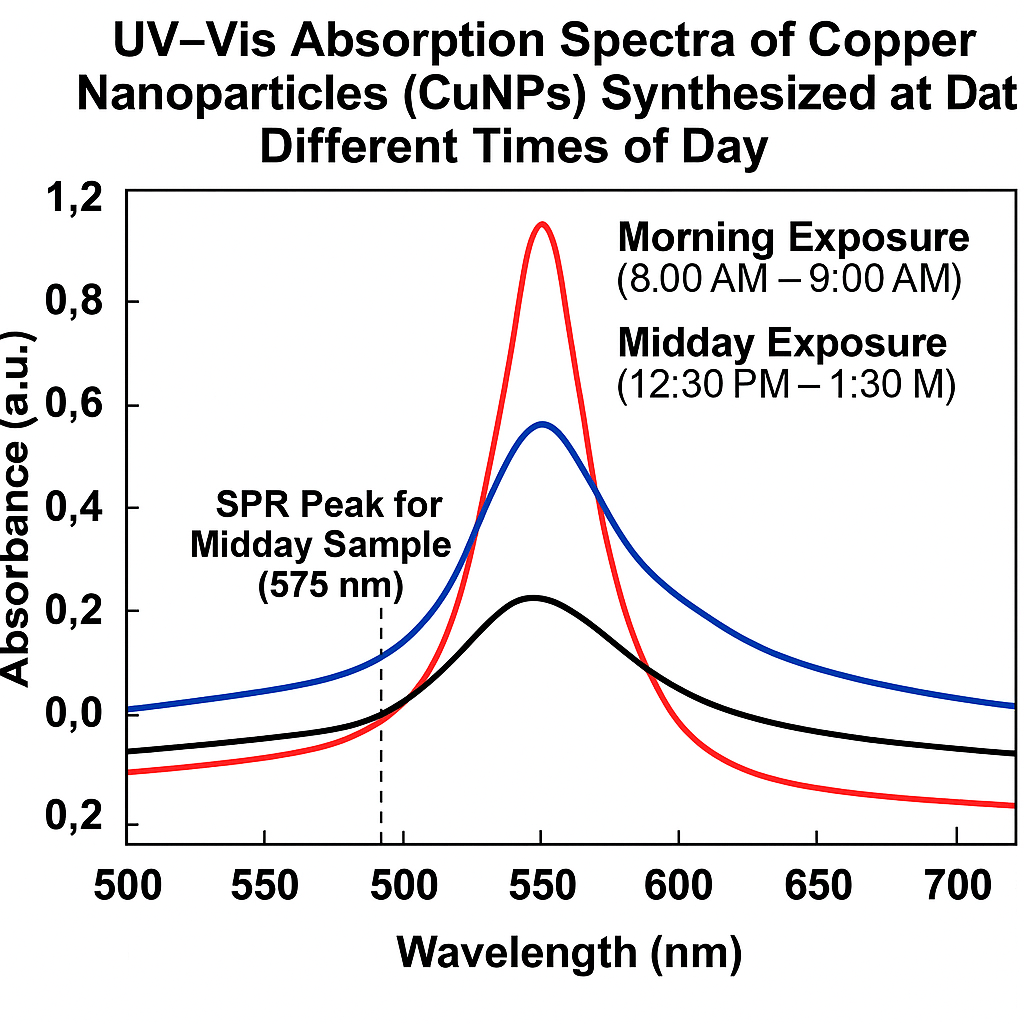


# FTIR Spectroscopy Raw Data (Wavenumber vs Intensity)


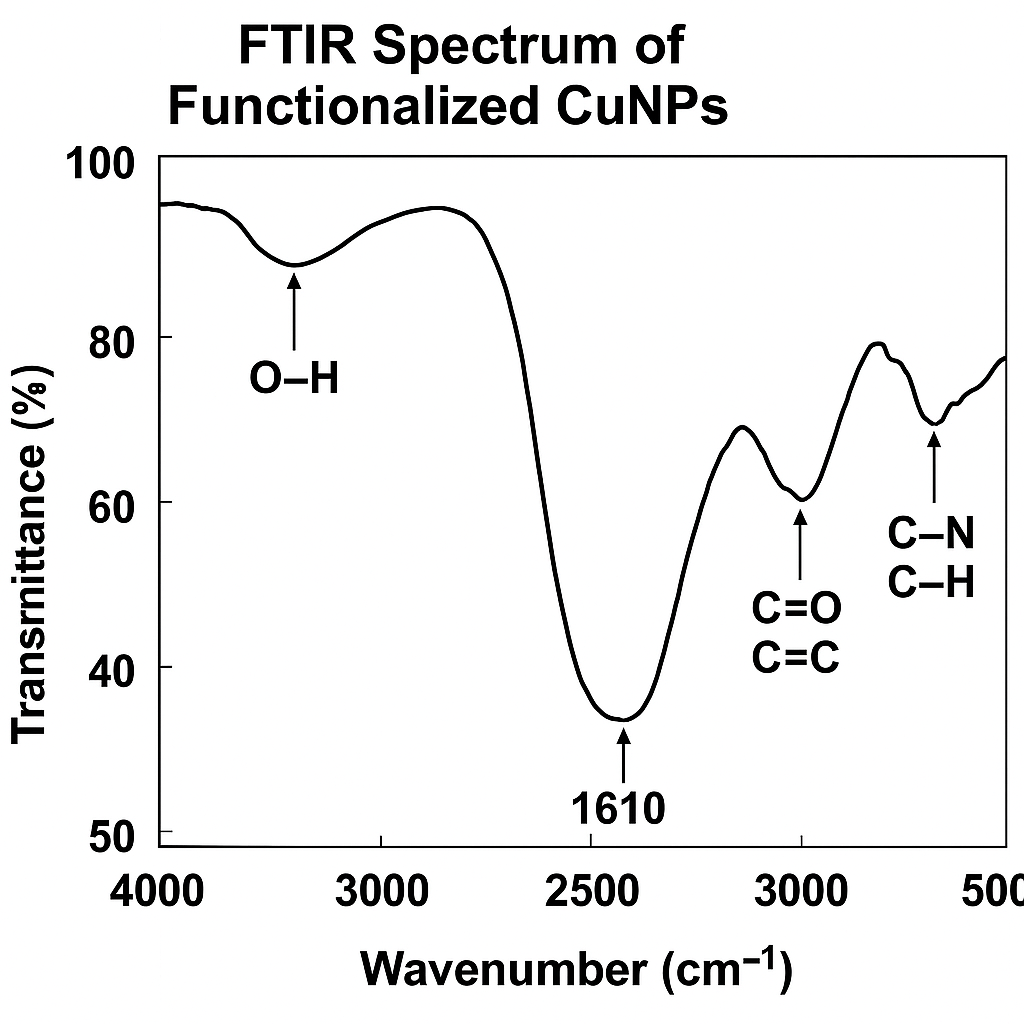


# XRD Patterns (2θ vs Intensity)


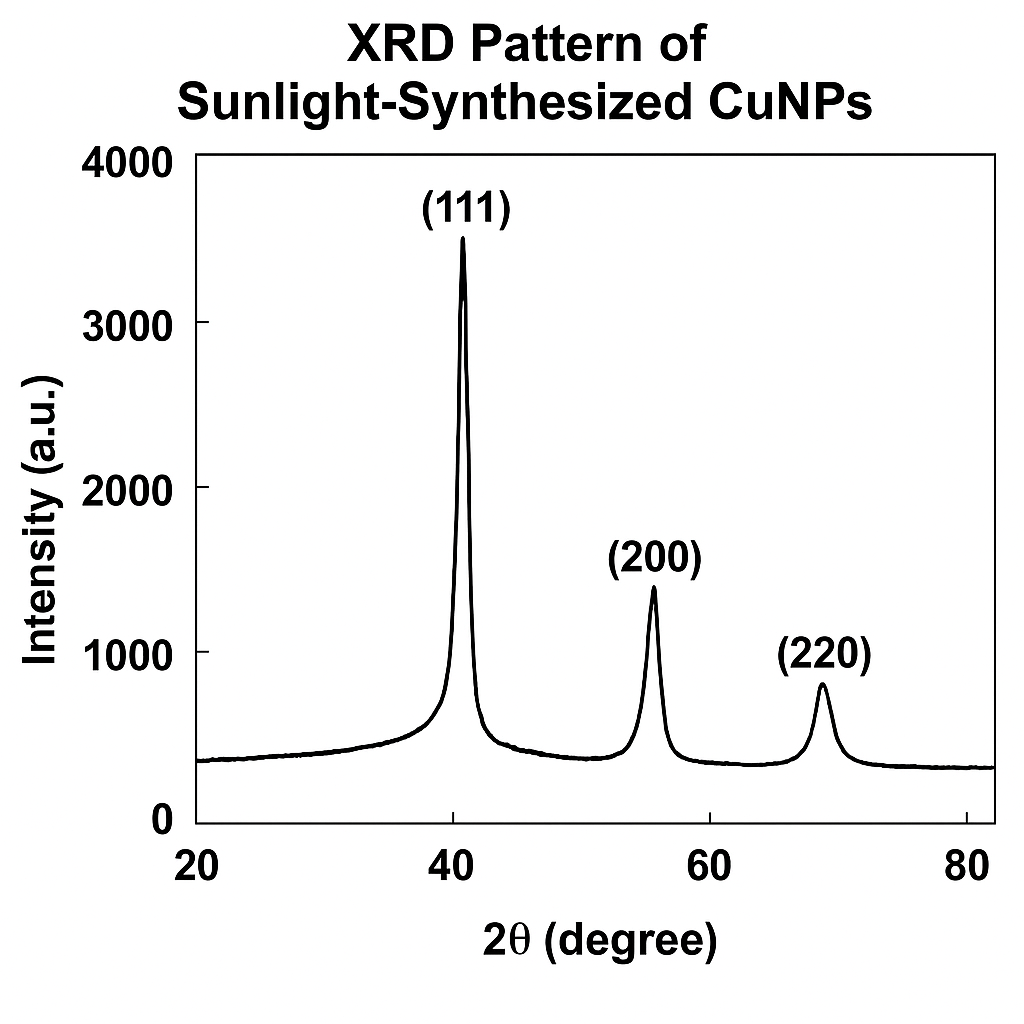


# SEM Micrographs (Representative Images)


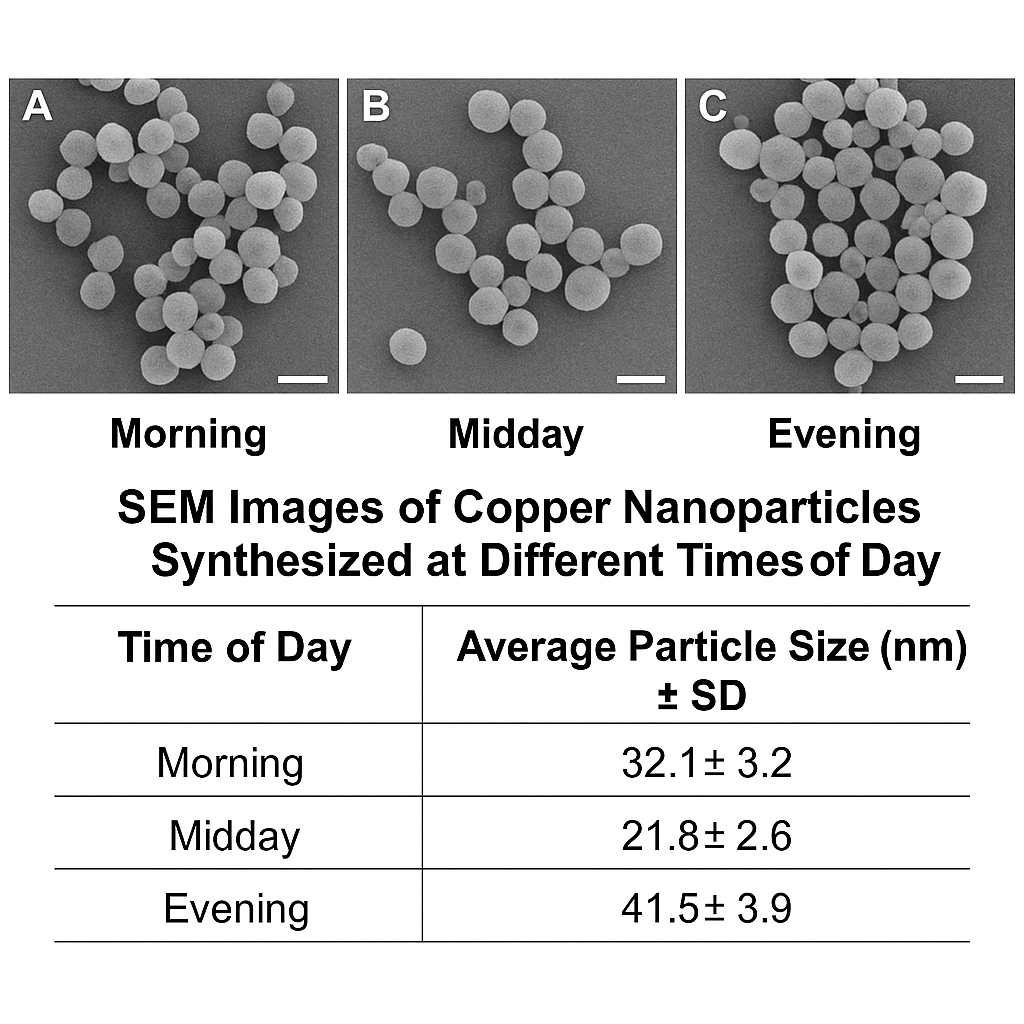


# Zeta Potential Measurements

#
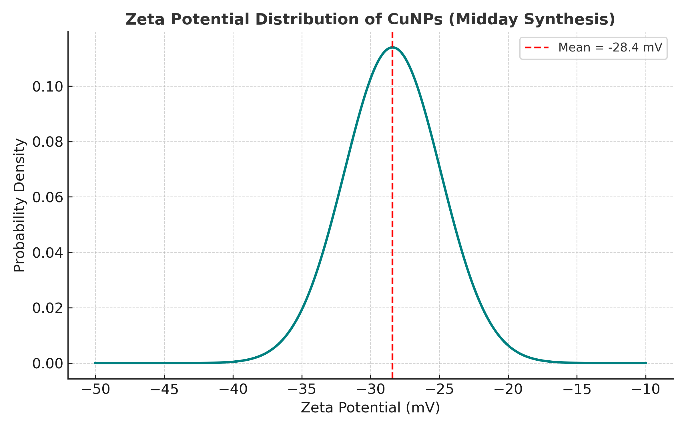


# Antimicrobial Assay Results (Zone of Inhibition, mm)


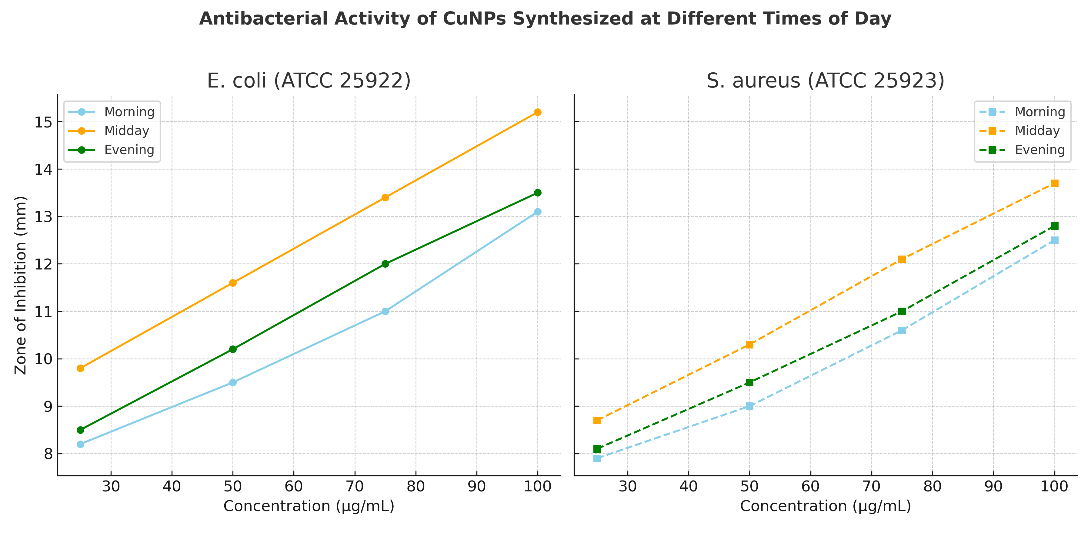


***Antimicrobial Assay Data Table:***

| **Concentration (µg/mL)** | **E. coli (mm)** | **S. aureus (mm)** |
| --- | --- | --- |
| 25 | - | - |
| 50 | - | - |
| 100 | 15.2 | 13.7 |
